# Supplementary material for: Altered miRNAs Expression Correlates With Gastroenteropancreatic Neuroendocrine Tumors Grades
Source: Front Oncol. 2020 Jul 17;10:1187. doi: 10.3389/fonc.2020.01187 (PMC7379872; doi:10.3389/fonc.2020.01187)
Supplement: Supplementary Table 1 — miRNAs differentially expressed in the comparison between patients with grading G3 (poorly differentiated NETs) vs G1 and G2 (well differentiated NETs). [file Table_1.XLSX]

## Sheet: Supplementary Table 1
miRNA name	Fold-change
hsa-miR-106b-5p	2.73648
hsa-miR-10a-5p	2.29649
hsa-miR-10b-5p	6.23738
hsa-miR-1281	2.72746
hsa-miR-130b-3p	5.56321
hsa-miR-15b-5p	2.22826
hsa-miR-17-5p	3.7076
hsa-miR-183-5p	5.50975
hsa-miR-1910-5p	2.36019
hsa-miR-192-5p	-3.85425
hsa-miR-194-5p	-2.60119
hsa-miR-195-5p	-2.11293
hsa-miR-197-3p	2.05924
hsa-miR-19a-3p	5.64012
hsa-miR-19b-3p	2.92385
hsa-miR-20a-5p	3.65306
hsa-miR-20b-5p	6.48697
hsa-miR-21-3p	2.75539
hsa-miR-210-3p	7.24292
hsa-miR-214-3p	3.92139
hsa-miR-25-3p	2.36899
hsa-miR-29a-3p	-2.18782
hsa-miR-29b-3p	-2.68679
hsa-miR-29c-3p	-3.71672
hsa-miR-3151-3p	2.57229
hsa-miR-3162-3p	2.62337
hsa-miR-3651	2.33819
hsa-miR-378i	2.77082
hsa-miR-3935	2.34987
hsa-miR-425-5p	4.22462
hsa-miR-4313	2.3119
hsa-miR-4436b-5p	3.06407
hsa-miR-4449	4.91714
hsa-miR-4465	-2.38902
hsa-miR-4649-3p	3.27386
hsa-miR-4673	-2.40109
hsa-miR-4767	2.3099
hsa-miR-486-5p	2.48126
hsa-miR-532-5p	2.63295
hsa-miR-574-3p	2.08937
hsa-miR-6131	-2.43278
hsa-miR-671-5p	2.07577
hsa-miR-6737-3p	2.16156
hsa-miR-6739-5p	7.05063
hsa-miR-6743-3p	3.03136
hsa-miR-6752-3p	2.11613
hsa-miR-6780a-5p	-2.10414
hsa-miR-6813-3p	2.70984
hsa-miR-6872-3p	2.03889
hsa-miR-7-5p	-10.0507
hsa-miR-766-3p	2.0026
hsa-miR-8485	3.86766
hsa-miR-874-3p	-2.17207
hsa-miR-92a-3p	3.28123
hsa-miR-93-5p	3.16954
hsa-miR-96-5p	3.64261
